# Supplementary material
Source: publisher site journal article supplement (https://www.spandidos-publications.com/6122/downloadSupplementary)
Supplement: Supplementary file 1 [file downloadSupplementary]

## Sheet: Supplementary Table S2
Table SII. 869 downregulated genes.
No.	Gene symbol	logFC	AveExpr	t	P-Value	B
1	FKBP3	-1.87374	5.12624	-4.39091	0.000927886	-3.94581
2	LOC100653280	-1.87374	5.12624	-4.39091	0.000927886	-3.94581
3	LOC100652866	-1.87374	5.12624	-4.39091	0.000927886	-3.94581
4	RNF7	-1.82314	6.54237	-4.39067	0.000928273	-3.94585
5	FAM35A	-1.92251	5.00298	-4.34736	0.0010006	-3.9518
6	PHKB	-1.55375	7.52145	-4.26575	0.0011533	-3.96326
7	SENP6	-1.46626	5.53714	-4.23655	0.00121364	-3.96743
8	HSDL2	-2.24133	5.70096	-4.23394	0.0012192	-3.9678
9	ANKRD12	-1.90604	7.93104	-4.18356	0.0013317	-3.97509
10	VPS54	-1.69784	5.14417	-4.17565	0.00135033	-3.97625
11	TCTN2	-1.29049	6.31954	-4.11606	0.00149957	-3.98504
12	RLF	-1.87075	6.32339	-4.10889	0.00151866	-3.98611
13	LARP4	-1.71054	5.44547	-4.10829	0.00152027	-3.9862
14	GPD2	-1.67348	5.73274	-4.09951	0.00154401	-3.98751
15	TBK1	-1.75311	5.65848	-4.08451	0.00158543	-3.98976
16	RFWD2	-1.04431	5.36755	-4.03052	0.00174434	-3.99794
17	MALT1	-1.21897	5.02607	-3.99733	0.00185014	-4.00304
18	LMBR1	-1.12774	5.16054	-3.99453	0.00185937	-4.00347
19	SNORA70G	-1.91559	3.99572	-3.95137	0.00200773	-4.01019
20	SNRK	-1.06309	5.26156	-3.90026	0.00219932	-4.01825
21	ABCD3	-1.22209	5.45559	-3.86489	0.00234289	-4.0239
22	PRKDC	-1.45283	5.58781	-3.82993	0.00249431	-4.02955
23	SLC25A16	-1.42372	4.94978	-3.80712	0.00259849	-4.03326
24	SLBP	-1.63621	6.36766	-3.77208	0.00276733	-4.03902
25	AQR	-1.92115	6.17529	-3.76219	0.00281704	-4.04065
26	BRWD1	-1.1074	5.37947	-3.76178	0.0028191	-4.04072
27	SLC35F5	-1.329	4.62971	-3.73963	0.00293377	-4.0444
28	NARS2	-1.1676	4.69834	-3.739	0.00293711	-4.0445
29	FCHO2	-1.52653	6.00407	-3.72224	0.00302718	-4.0473
30	ARRDC3	-2.08805	6.46569	-3.72076	0.00303526	-4.04755
31	MKLN1	-1.16386	6.1107	-3.68059	0.00326352	-4.05432
32	MIR4315-1	-1.93014	6.55788	-3.67987	0.00326773	-4.05444
33	MIR4315-2	-1.93014	6.55788	-3.67987	0.00326773	-4.05444
34	STK38	-1.60262	5.6459	-3.65906	0.00339302	-4.05798
35	TMEM30A	-1.56113	5.13105	-3.65011	0.00344836	-4.05951
36	NLK	-1.68577	6.79668	-3.63728	0.00352941	-4.06171
37	PPP4R1	-1.81917	7.21986	-3.6333	0.00355492	-4.06239
38	C9orf41	-1.68798	5.26337	-3.62602	0.00360204	-4.06364
39	CYLD	-1.19565	6.08641	-3.62461	0.0036113	-4.06388
40	CACNA1C-AS4	-1.27222	6.41816	-3.62227	0.00362664	-4.06429
41	TXNRD1	-1.31449	5.38554	-3.60567	0.00373736	-4.06715
42	C3orf37	-1.07983	5.76957	-3.60315	0.00375447	-4.06759
43	SS18	-1.25101	5.21796	-3.60012	0.00377515	-4.06811
44	VPS8	-1.32951	5.19719	-3.59027	0.00384322	-4.06983
45	LOC100505729	-1.32951	5.19719	-3.59027	0.00384322	-4.06983
46	SSH2	-1.69028	5.84289	-3.58296	0.00389448	-4.0711
47	SPHAR	-1.44126	5.14405	-3.57522	0.00394961	-4.07245
48	RAB4A	-1.44126	5.14405	-3.57522	0.00394961	-4.07245
49	DDX17	-1.08144	6.1825	-3.56891	0.00399508	-4.07355
50	VPS13B	-1.01604	6.05937	-3.56485	0.00402461	-4.07426
51	IL6ST	-1.95862	5.45876	-3.56419	0.00402945	-4.07437
52	CNOT6	-1.35204	4.75842	-3.56015	0.00405912	-4.07508
53	EPS15	-2.05076	7.05818	-3.55273	0.00411424	-4.07638
54	PPP2R5A	-1.51786	6.34443	-3.55184	0.00412088	-4.07654
55	CEP85L	-1.18958	5.16686	-3.55114	0.00412616	-4.07666
56	ZSWIM6	-1.04833	7.46423	-3.55049	0.00413103	-4.07678
57	PPP6R3	-1.08711	5.71818	-3.54243	0.00419193	-4.0782
58	AZIN1	-1.70895	5.92226	-3.53681	0.00423502	-4.07919
59	VPS13D	-1.1321	4.81824	-3.53655	0.00423696	-4.07923
60	ACTR3	-2.07548	6.35112	-3.53469	0.00425137	-4.07956
61	MIR539	-1.5507	3.7431	-3.52946	0.00429194	-4.08048
62	ATF6	-1.93284	6.06478	-3.5171	0.00438954	-4.08267
63	MIR494	-1.18742	4.31075	-3.51448	0.0044105	-4.08314
64	CAB39L	-1.26356	4.91999	-3.50804	0.0044625	-4.08428
65	ZNF148	-1.02336	5.82185	-3.50691	0.00447165	-4.08448
66	GATAD1	-1.10756	4.91683	-3.50317	0.0045022	-4.08515
67	PDS5B	-1.52567	5.45018	-3.50287	0.00450468	-4.0852
68	NRIP1	-1.75262	5.79686	-3.49597	0.00456165	-4.08643
69	IFRD1	-1.48371	5.6928	-3.4901	0.00461062	-4.08748
70	MAP2K5	-1.20322	4.6255	-3.48815	0.00462707	-4.08783
71	BIRC6	-1.40091	6.11033	-3.48678	0.00463857	-4.08807
72	IL8	-3.45093	7.66516	-3.48326	0.00466844	-4.0887
73	ZNF146	-1.13034	5.37444	-3.48203	0.00467887	-4.08892
74	GNS	-1.11225	6.19104	-3.46756	0.00480395	-4.09152
75	EFHA1	-1.11452	4.47935	-3.45285	0.00493453	-4.09417
76	RARS	-1.64299	5.45063	-3.45107	0.0049505	-4.09449
77	STRAP	-1.35744	5.67406	-3.45089	0.00495217	-4.09452
78	LOC100653179	-1.35744	5.67406	-3.45089	0.00495217	-4.09452
79	LOC100653013	-1.35744	5.67406	-3.45089	0.00495217	-4.09452
80	CEP192	-1.38601	5.67156	-3.44874	0.00497163	-4.09491
81	TRAPPC8	-2.01545	6.96788	-3.44421	0.00501283	-4.09573
82	SPG11	-1.23041	5.91863	-3.44372	0.00501732	-4.09582
83	TGFBR1	-1.17176	5.0751	-3.44356	0.00501882	-4.09585
84	MTMR10	-1.35824	6.90024	-3.43959	0.00505525	-4.09656
85	CYP20A1	-1.0666	4.53853	-3.43121	0.00513318	-4.09808
86	FAM200B	-1.57562	5.36549	-3.4277	0.0051662	-4.09872
87	WRN	-1.60896	5.49655	-3.42659	0.00517665	-4.09892
88	RAB8B	-1.35533	7.69297	-3.42579	0.00518422	-4.09907
89	UBE3A	-1.92777	5.74161	-3.42574	0.00518465	-4.09908
90	ARL8B	-1.92384	5.71406	-3.41621	0.00527563	-4.10081
91	SPAG9	-1.52015	6.95157	-3.41544	0.00528304	-4.10095
92	PPP2R5E	-1.26921	5.57352	-3.41427	0.00529443	-4.10116
93	EIF2C4	-1.2298	5.55661	-3.41048	0.0053311	-4.10185
94	LRPPRC	-1.41366	4.88103	-3.40857	0.00534982	-4.1022
95	SETX	-1.16979	6.73032	-3.40763	0.00535896	-4.10238
96	ELF2	-1.03267	5.38785	-3.40652	0.00536985	-4.10258
97	HELZ	-1.25199	5.54512	-3.40544	0.00538046	-4.10278
98	VPS13A	-2.01353	6.15983	-3.39995	0.00543463	-4.10378
99	TMEM38B	-1.4075	6.55566	-3.39977	0.00543643	-4.10381
100	GPCPD1	-1.68583	5.93257	-3.39872	0.00544687	-4.104
101	MSH3	-1.19411	5.18937	-3.39772	0.00545681	-4.10419
102	LMBRD1	-1.7217	5.32591	-3.39562	0.00547786	-4.10457
103	PSMB1	-1.67119	5.44826	-3.39233	0.00551081	-4.10517
104	UPF2	-1.57726	5.73792	-3.38835	0.00555105	-4.1059
105	CPD	-2.04402	7.2035	-3.38501	0.00558509	-4.10652
106	BRAF	-1.06884	7.99926	-3.3811	0.00562515	-4.10724
107	ANKMY2	-1.02011	4.28459	-3.37845	0.00565247	-4.10772
108	SERAC1	-1.01667	5.85177	-3.37609	0.00567683	-4.10816
109	CHD9	-1.2483	5.96951	-3.37427	0.00569583	-4.10849
110	C20orf111	-1.43128	7.85023	-3.37177	0.00572193	-4.10896
111	WDR82	-1.14327	4.94713	-3.37167	0.00572294	-4.10897
112	CTDSPL2	-1.29328	5.60891	-3.36881	0.0057529	-4.1095
113	GTF2H2	-1.02327	4.13171	-3.36755	0.00576621	-4.10973
114	TMCC1	-1.00503	6.06935	-3.36014	0.00584488	-4.1111
115	KIAA0368	-1.59178	6.06286	-3.35902	0.00585681	-4.11131
116	PARN	-1.60163	6.22696	-3.35712	0.00587724	-4.11166
117	LYPLA1	-1.23327	5.94265	-3.34358	0.00602468	-4.11417
118	USP34	-1.65292	6.45631	-3.34175	0.0060449	-4.11451
119	USP37	-1.43941	5.79662	-3.34116	0.00605137	-4.11462
120	PCNX	-1.43817	6.24189	-3.33754	0.0060916	-4.11529
121	SCAMP1	-2.02429	6.45478	-3.33654	0.00610273	-4.11548
122	EXOC5	-1.03796	4.96066	-3.33178	0.0061562	-4.11636
123	MICU1	-1.03765	5.21265	-3.32311	0.00625469	-4.11798
124	NUP107	-1.06147	4.77773	-3.32205	0.00626685	-4.11818
125	GTF2H2C	-1.02548	4.59342	-3.31619	0.00633436	-4.11927
126	GTF2H2D	-1.02548	4.59342	-3.31619	0.00633436	-4.11927
127	GOLGA5	-1.6321	6.33169	-3.31584	0.00633849	-4.11934
128	PDE3B	-1.1792	4.55805	-3.31482	0.00635033	-4.11953
129	SNTB2	-1.1783	7.4969	-3.31249	0.00637746	-4.11996
130	ARID2	-1.47881	7.20497	-3.31098	0.00639508	-4.12025
131	PPIL4	-1.16576	4.73782	-3.30906	0.00641764	-4.12061
132	SNORD91A	-1.17907	3.4967	-3.30789	0.00643138	-4.12083
133	MPP6	-1.06949	6.7215	-3.30543	0.00646049	-4.12129
134	UBR1	-1.62162	6.17952	-3.30497	0.00646591	-4.12137
135	CDC73	-1.3711	6.82224	-3.30357	0.00648247	-4.12164
136	STRN3	-1.44057	6.18333	-3.30076	0.00651601	-4.12216
137	ZDHHC21	-1.03922	3.6482	-3.2995	0.00653103	-4.1224
138	C10orf118	-1.69415	6.37257	-3.29898	0.00653729	-4.1225
139	MIR2110	-1.69415	6.37257	-3.29898	0.00653729	-4.1225
140	WDR26	-1.55465	6.05524	-3.29776	0.00655188	-4.12273
141	PIGB	-1.89523	4.96379	-3.28945	0.00665244	-4.12429
142	CAPN7	-1.29128	4.8913	-3.28933	0.00665388	-4.12431
143	CKAP5	-1.37514	6.14411	-3.28216	0.00674192	-4.12566
144	KPNA4	-1.28932	5.16942	-3.2815	0.00675005	-4.12579
145	RNF19B	-1.37944	6.72442	-3.27792	0.0067945	-4.12646
146	RNF180	-1.16051	4.27143	-3.27539	0.00682604	-4.12694
147	UBL3	-1.58556	5.57326	-3.27286	0.00685775	-4.12742
148	XPNPEP3	-1.30604	5.1658	-3.26835	0.00691473	-4.12827
149	TLK1	-1.29218	5.91996	-3.26696	0.00693233	-4.12853
150	ATG2B	-1.91026	6.67667	-3.26193	0.00699659	-4.12949
151	RANBP2	-1.33341	6.04304	-3.26074	0.0070119	-4.12971
152	CHML	-1.3093	5.21048	-3.2597	0.00702522	-4.12991
153	HNRNPA2B1	-1.32841	5.95804	-3.25911	0.0070329	-4.13002
154	ATP11B	-1.14336	6.56915	-3.25855	0.00704007	-4.13013
155	GTF2H2B	-1.48559	5.89079	-3.25842	0.00704172	-4.13015
156	CRLF3	-1.34205	6.11387	-3.25677	0.00706305	-4.13046
157	RPS6KC1	-1.30591	6.46387	-3.25465	0.00709059	-4.13087
158	MAP4K3	-1.25774	6.28106	-3.25421	0.00709631	-4.13095
159	MED1	-1.61799	6.01927	-3.25361	0.0071041	-4.13106
160	RSPRY1	-1.1669	5.2191	-3.24961	0.00715649	-4.13183
161	MAPRE1	-1.54915	5.78709	-3.24892	0.00716549	-4.13196
162	CHD1	-1.50575	5.45288	-3.24669	0.00719484	-4.13238
163	ZNF410	-1.1084	4.96267	-3.24599	0.00720407	-4.13251
164	TNPO3	-1.45464	6.28596	-3.24537	0.00721229	-4.13263
165	MT1A	-3.15171	7.77195	-3.24422	0.00722754	-4.13285
166	IPO11	-1.19684	4.27286	-3.2442	0.00722778	-4.13285
167	IREB2	-1.11081	5.36028	-3.23796	0.00731102	-4.13404
168	BRE	-1.06668	6.25995	-3.23619	0.00733473	-4.13438
169	BTBD7	-1.57427	5.45005	-3.23345	0.00737177	-4.1349
170	FAM135A	-1.48615	6.22877	-3.23298	0.00737805	-4.13499
171	RBL2	-1.26173	5.87338	-3.22855	0.00743826	-4.13584
172	FBXL20	-1.04087	5.71273	-3.22228	0.00752434	-4.13704
173	PPM1A	-1.4956	6.48864	-3.22005	0.0075553	-4.13746
174	TIPRL	-1.35886	5.0505	-3.21675	0.00760116	-4.1381
175	CIRH1A	-1.14758	5.86101	-3.21587	0.00761347	-4.13827
176	SPATA1	-1.95133	6.53528	-3.21483	0.00762793	-4.13846
177	PANK3	-1.44656	5.68076	-3.20775	0.00772772	-4.13982
178	NDEL1	-1.69911	6.76994	-3.20537	0.00776156	-4.14028
179	IPO7	-1.76405	5.34074	-3.20355	0.00778763	-4.14063
180	NAA35	-1.20246	6.05954	-3.20345	0.00778905	-4.14065
181	TXNDC16	-1.73831	5.19863	-3.19952	0.00784546	-4.14141
182	CCT4	-1.86076	5.61526	-3.19835	0.00786232	-4.14163
183	PAPD4	-1.23923	5.78733	-3.19669	0.00788633	-4.14195
184	TM7SF3	-1.45002	7.37791	-3.19657	0.007888	-4.14197
185	FAM208A	-1.17204	5.40652	-3.19615	0.00789416	-4.14205
186	HEATR5A	-1.06853	5.25064	-3.19445	0.00791878	-4.14238
187	VPS35	-1.02249	6.30423	-3.18876	0.00800195	-4.14348
188	IVNS1ABP	-2.30117	5.96288	-3.18579	0.00804572	-4.14405
189	ARFGEF1	-1.24002	5.9012	-3.18538	0.00805169	-4.14413
190	FNIP1	-1.45092	6.04733	-3.18479	0.00806045	-4.14424
191	CASD1	-1.41825	5.34288	-3.18397	0.00807271	-4.1444
192	CCDC138	-1.98354	6.62334	-3.18316	0.00808458	-4.14456
193	NUFIP2	-1.14474	6.29221	-3.18258	0.00809334	-4.14467
194	PAN3	-1.27247	6.6592	-3.18232	0.00809721	-4.14472
195	LOC401164	-1.23309	3.74331	-3.18051	0.00812403	-4.14507
196	NOLC1	-1.38611	6.10125	-3.17834	0.00815648	-4.14549
197	FAR1	-1.2757	5.72056	-3.17604	0.00819109	-4.14594
198	UGGT2	-1.50128	5.80394	-3.17404	0.00822123	-4.14632
199	PCMT1	-1.8404	5.19568	-3.16922	0.00829432	-4.14726
200	MT1H	-2.85545	6.76848	-3.16504	0.00835826	-4.14807
201	GAPVD1	-1.21446	5.00591	-3.16455	0.00836571	-4.14816
202	ZCCHC6	-1.84496	6.00228	-3.16057	0.00842721	-4.14893
203	CRKL	-1.19328	5.24866	-3.15974	0.00844005	-4.1491
204	UBE2K	-1.24783	8.73088	-3.15974	0.00844007	-4.1491
205	CAPZA1	-1.33007	4.52455	-3.15246	0.00855369	-4.15051
206	USP15	-1.12789	6.45198	-3.14929	0.0086037	-4.15113
207	SUPT3H	-1.54235	6.13149	-3.14852	0.00861588	-4.15128
208	NCOA3	-1.07101	5.42897	-3.14692	0.00864115	-4.15159
209	ADD3	-1.14278	4.54973	-3.14606	0.00865483	-4.15176
210	MRPS31P3	-1.09947	4.74116	-3.14587	0.00865785	-4.15179
211	TPTE2P2	-1.09947	4.74116	-3.14587	0.00865785	-4.15179
212	THSD1P1	-1.09947	4.74116	-3.14587	0.00865785	-4.15179
213	STYX	-1.19019	5.57866	-3.14397	0.0086881	-4.15216
214	PLEKHM1	-1.16238	5.40522	-3.14281	0.00870668	-4.15239
215	COL4A3BP	-1.28892	7.28159	-3.14278	0.00870721	-4.1524
216	SLC12A2	-1.24318	6.68447	-3.14098	0.00873608	-4.15275
217	DGKE	-1.0625	4.59762	-3.13915	0.00876548	-4.1531
218	SPIN1	-1.20503	6.31574	-3.13683	0.00880282	-4.15356
219	GDE1	-1.27713	5.15905	-3.13271	0.00886978	-4.15436
220	TOM1L1	-1.34599	6.96561	-3.13261	0.0088715	-4.15438
221	GNPAT	-1.75061	6.66465	-3.13075	0.00890182	-4.15475
222	2023-03-07	-1.69987	5.98018	-3.12026	0.00907506	-4.1568
223	C6orf165	-1.17595	5.29904	-3.11575	0.00915062	-4.15768
224	AGTPBP1	-1.7363	6.95094	-3.10867	0.0092706	-4.15908
225	LPXN	-1.27041	6.50803	-3.10723	0.00929515	-4.15936
226	TMEM184C	-1.38263	5.66999	-3.10062	0.00940868	-4.16066
227	CENPN	-1.3976	4.83366	-3.10044	0.00941189	-4.16069
228	LOC100506025	-1.65879	6.54835	-3.10044	0.00941191	-4.16069
229	PUM2	-1.6925	5.76968	-3.09822	0.00945032	-4.16113
230	MFSD11	-1.66313	6.70278	-3.09785	0.00945677	-4.1612
231	MTCH2	-1.0787	7.74491	-3.09712	0.00946952	-4.16135
232	RASA1	-1.31552	4.79396	-3.09657	0.00947911	-4.16146
233	FNBP1L	-1.22888	5.7593	-3.09469	0.00951187	-4.16183
234	RNU4ATAC	-1.85918	4.5228	-3.08789	0.00963155	-4.16317
235	ACTR2	-1.01169	7.12406	-3.08744	0.00963955	-4.16326
236	ERBB2IP	-1.24077	7.71139	-3.08726	0.00964279	-4.16329
237	KIAA0232	-1.224	4.67935	-3.08718	0.00964413	-4.16331
238	PPTC7	-1.6027	5.42357	-3.08662	0.00965399	-4.16342
239	XPO6	-1.10539	9.00391	-3.08521	0.00967908	-4.1637
240	DDX5	-1.9244	5.84764	-3.08177	0.00974059	-4.16438
241	ADRBK2	-1.50496	6.67511	-3.08166	0.00974255	-4.1644
242	SF3B14	-1.5296	5.5114	-3.08165	0.00974263	-4.1644
243	LONRF1	-1.27691	6.32608	-3.07911	0.00978825	-4.1649
244	GALC	-1.03445	5.09992	-3.07879	0.00979401	-4.16497
245	ANKRD44	-1.34452	5.43796	-3.07836	0.00980183	-4.16505
246	PHF3	-1.57522	5.04857	-3.07596	0.00984523	-4.16553
247	ARPP19	-1.17412	6.66945	-3.07552	0.00985324	-4.16562
248	TADA2A	-2.06754	6.60748	-3.07503	0.00986199	-4.16571
249	TTC3	-1.1875	5.53535	-3.07414	0.00987817	-4.16589
250	CLEC4A	-1.59953	5.31242	-3.07383	0.00988387	-4.16595
251	JMJD1C	-1.11137	5.9932	-3.07339	0.00989176	-4.16604
252	MIR5047	-1.99177	4.57064	-3.07271	0.00990414	-4.16617
253	TROVE2	-1.05345	4.92276	-3.06845	0.0099821	-4.16702
254	TBCD	-1.07271	5.9152	-3.06814	0.00998772	-4.16708
255	RPAP2	-1.32763	4.0596	-3.06317	0.0100795	-4.16806
256	GIT2	-1.02496	5.60842	-3.06263	0.0100895	-4.16817
257	EIF3A	-1.2167	6.6033	-3.05875	0.0101619	-4.16894
258	CCDC90B	-1.15305	5.14579	-3.052	0.0102887	-4.17028
259	EFHA2	-1.15232	4.03516	-3.05136	0.0103009	-4.17041
260	YPEL5	-1.22665	6.08451	-3.04856	0.0103539	-4.17097
261	TBCK	-1.61926	6.06806	-3.04548	0.0104129	-4.17158
262	PDCD6IP	-1.26726	4.75582	-3.04472	0.0104273	-4.17173
263	TAOK1	-1.44496	5.96572	-3.04425	0.0104365	-4.17183
264	DDX27	-1.02423	4.56862	-3.03854	0.0105466	-4.17297
265	GTF3C6	-1.0858	4.5723	-3.03444	0.0106265	-4.17379
266	CDK8	-1.4236	6.06049	-3.03431	0.010629	-4.17381
267	PIGY	-2.12527	5.55882	-3.0337	0.010641	-4.17394
268	MALAT1	-2.09436	6.04791	-3.03292	0.0106562	-4.17409
269	USP9X	-1.3471	5.02243	-3.03272	0.0106601	-4.17413
270	RRP36	-1.0709	5.28244	-3.03239	0.0106666	-4.1742
271	SYNRG	-1.15619	6.82888	-3.02927	0.010728	-4.17482
272	LRRC9	-1.83815	6.73267	-3.02822	0.0107487	-4.17503
273	UBAP1	-1.19719	6.45135	-3.02748	0.0107633	-4.17518
274	STAU1	-1.26814	7.11739	-3.02673	0.0107782	-4.17533
275	PIK3C2A	-1.84395	6.97566	-3.02617	0.0107895	-4.17544
276	NCOR1	-1.13786	6.08661	-3.02567	0.0107992	-4.17554
277	ZNF438	-1.54358	5.78028	-3.02298	0.0108528	-4.17608
278	C6orf70	-1.52638	5.24959	-3.02247	0.010863	-4.17618
279	UTP18	-1.66332	6.27499	-3.01969	0.0109187	-4.17674
280	UBA2	-2.00299	6.92351	-3.01841	0.0109445	-4.177
281	C1orf27	-1.63702	4.96043	-3.01678	0.0109773	-4.17732
282	RB1CC1	-1.09262	6.13036	-3.01645	0.010984	-4.17739
283	MIR9-1	-1.10855	3.84285	-3.01625	0.0109882	-4.17743
284	SPAST	-1.20073	5.53569	-3.0152	0.0110094	-4.17764
285	KIAA1731	-1.14535	5.31812	-3.01427	0.0110282	-4.17783
286	EYA3	-1.28228	6.14089	-3.01046	0.0111058	-4.17859
287	RAD21L1	-1.66401	4.94027	-3.00808	0.0111545	-4.17907
288	YTHDC2	-1.3816	5.66773	-3.00799	0.0111563	-4.17909
289	SRGN	-2.86678	7.90308	-3.00582	0.011201	-4.17953
290	SMCHD1	-1.70744	6.7724	-3.00563	0.0112049	-4.17956
291	GDI2	-1.57796	6.37947	-2.99837	0.0113556	-4.18102
292	GSK3B	-1.47103	7.85432	-2.99776	0.0113683	-4.18115
293	KIAA2026	-1.00684	5.61968	-2.99651	0.0113945	-4.1814
294	FIG4	-1.08417	4.75967	-2.99376	0.0114522	-4.18195
295	MAN1A2	-1.51779	5.97149	-2.98917	0.0115495	-4.18288
296	FAM116A	-1.11397	4.91802	-2.98898	0.0115534	-4.18292
297	HAT1	-1.10067	6.29923	-2.9871	0.0115935	-4.1833
298	SKAP2	-1.46756	6.41659	-2.98706	0.0115942	-4.1833
299	GBA2	-1.50087	4.83153	-2.98593	0.0116183	-4.18353
300	LOC148145	-1.38958	5.38868	-2.98579	0.0116214	-4.18356
301	CREBRF	-1.24818	4.46046	-2.98478	0.0116431	-4.18377
302	CHD2	-1.06839	5.59772	-2.98401	0.0116595	-4.18392
303	DNAJC24	-1.09141	5.54975	-2.98252	0.0116915	-4.18422
304	WRB	-1.006	4.62544	-2.97592	0.0118343	-4.18556
305	FAM149B1	-1.17524	6.56438	-2.97219	0.0119159	-4.18631
306	AKT3	-1.30845	6.68182	-2.97126	0.0119362	-4.1865
307	HERC4	-1.13246	5.9266	-2.9712	0.0119375	-4.18651
308	EDEM1	-1.12155	4.49769	-2.97096	0.0119429	-4.18656
309	BTAF1	-1.22775	5.70583	-2.97073	0.0119478	-4.18661
310	SUZ12	-1.75991	6.74193	-2.97006	0.0119626	-4.18674
311	UBR3	-1.23666	5.25794	-2.96759	0.012017	-4.18724
312	ERCC6L2	-1.0688	5.28417	-2.9668	0.0120346	-4.1874
313	SEC24A	-1.53227	5.86855	-2.96524	0.0120691	-4.18772
314	CPSF2	-1.50437	4.88797	-2.96502	0.012074	-4.18776
315	SASS6	-1.07416	4.30459	-2.96403	0.012096	-4.18797
316	MBTD1	-1.38743	5.40398	-2.95742	0.0122441	-4.18931
317	LRBA	-1.0713	7.04726	-2.95729	0.0122471	-4.18933
318	AP5M1	-1.1188	4.65406	-2.95692	0.0122554	-4.18941
319	USP12	-1.99984	5.45226	-2.95501	0.0122984	-4.1898
320	MT1M	-2.32826	5.21498	-2.95372	0.0123278	-4.19006
321	STRBP	-1.21929	6.01094	-2.95315	0.0123406	-4.19017
322	EFR3A	-1.13582	5.93945	-2.95171	0.0123735	-4.19047
323	DIS3	-1.54204	6.88078	-2.94754	0.0124686	-4.19132
324	EP300	-1.70571	6.14097	-2.94269	0.0125805	-4.19231
325	TFRC	-1.21673	4.80009	-2.93784	0.0126932	-4.19329
326	MAPK6	-1.04227	5.36138	-2.93458	0.0127695	-4.19396
327	KIAA1279	-1.01567	5.19717	-2.9313	0.0128469	-4.19463
328	CYP51A1	-1.05241	6.17071	-2.92654	0.0129598	-4.1956
329	SBNO1	-1.56298	6.03072	-2.92556	0.0129831	-4.1958
330	KIAA1033	-1.54982	5.04592	-2.92437	0.0130118	-4.19605
331	FARSB	-1.06358	7.68505	-2.92369	0.0130278	-4.19618
332	UQCRC2	-1.42677	6.68794	-2.92194	0.0130699	-4.19654
333	ECD	-1.05425	6.65119	-2.92103	0.013092	-4.19673
334	CEP70	-1.61284	6.37617	-2.92073	0.013099	-4.19679
335	C10orf76	-1.39604	4.6945	-2.91578	0.013219	-4.1978
336	ATP6V1C1	-1.50925	4.76132	-2.91575	0.0132196	-4.19781
337	INPP4B	-1.50405	5.27115	-2.91309	0.0132846	-4.19836
338	FANCL	-1.0199	4.71799	-2.91126	0.0133293	-4.19873
339	EDEM3	-1.49228	5.66221	-2.9105	0.0133479	-4.19889
340	ARFGEF2	-1.72401	5.80478	-2.90807	0.0134078	-4.19938
341	TMEM48	-1.78188	5.6035	-2.90713	0.013431	-4.19958
342	USP38	-1.18127	5.90525	-2.90673	0.0134409	-4.19966
343	TDRD5	-1.01324	4.59136	-2.90233	0.0135499	-4.20056
344	POLDIP2	-1.18106	8.17384	-2.90127	0.0135765	-4.20078
345	TTTY16	-1.3657	5.13883	-2.90101	0.013583	-4.20083
346	ZNF644	-1.38934	5.35501	-2.89799	0.0136586	-4.20145
347	EIF5	-1.0916	5.88529	-2.89752	0.0136705	-4.20155
348	DCAF6	-1.02852	6.68212	-2.8897	0.0138684	-4.20316
349	AFF4	-1.14844	7.03136	-2.88938	0.0138767	-4.20323
350	ABCE1	-1.27646	4.94266	-2.88923	0.0138804	-4.20326
351	ACAA2	-1.90821	5.99231	-2.88833	0.0139035	-4.20344
352	LOC100506321	-1.81612	5.91774	-2.88218	0.0140615	-4.20471
353	DDX10	-1.09862	4.07036	-2.88207	0.0140645	-4.20473
354	ME2	-1.14069	5.55011	-2.88096	0.0140932	-4.20496
355	SLMAP	-1.05348	4.92821	-2.87923	0.0141381	-4.20532
356	P4HA1	-1.07797	4.96283	-2.87586	0.0142261	-4.20602
357	ANKRD28	-1.02541	6.78985	-2.87373	0.014282	-4.20646
358	WDR48	-1.24932	5.97202	-2.87348	0.0142885	-4.20651
359	FNDC3A	-1.40925	6.23197	-2.87247	0.014315	-4.20672
360	PAPOLG	-1.02399	4.80185	-2.87172	0.0143347	-4.20687
361	RHOT1	-1.54657	5.32991	-2.87168	0.0143357	-4.20688
362	DHX15	-1.02819	4.74842	-2.86971	0.0143878	-4.20729
363	CSPP1	-1.29742	6.40184	-2.86574	0.0144933	-4.20811
364	KIAA1715	-1.12226	6.83565	-2.86211	0.0145903	-4.20886
365	TEX9	-1.34282	4.99926	-2.861	0.01462	-4.20909
366	PARP8	-1.15528	6.23779	-2.86073	0.0146273	-4.20914
367	POLI	-1.40497	6.71894	-2.8558	0.0147607	-4.21017
368	NFAT5	-1.79217	5.38564	-2.85575	0.0147621	-4.21018
369	APPBP2	-1.90431	5.3462	-2.85406	0.0148078	-4.21053
370	SLPI	-1.8567	5.66266	-2.85341	0.0148256	-4.21066
371	TAF2	-1.18103	4.87121	-2.85052	0.0149047	-4.21126
372	ENPP1	-1.06464	5.11105	-2.84999	0.0149191	-4.21137
373	JAK1	-1.0704	7.92641	-2.84992	0.0149211	-4.21139
374	TTLL11	-1.06173	5.48784	-2.84725	0.0149945	-4.21194
375	ADSS	-1.05376	7.31723	-2.84708	0.0149992	-4.21198
376	STK17A	-1.89734	5.29415	-2.84306	0.0151105	-4.21281
377	RNF17	-1.76878	5.71677	-2.84126	0.0151604	-4.21318
378	PHF10	-1.39299	5.8343	-2.84052	0.0151811	-4.21334
379	CCDC83	-1.89759	6.80088	-2.8405	0.0151818	-4.21334
380	CD109	-1.16075	4.73547	-2.83975	0.0152027	-4.2135
381	UBXN2B	-1.15676	4.00638	-2.83973	0.0152032	-4.2135
382	SHOC2	-1.05905	8.19451	-2.83963	0.0152059	-4.21352
383	AHI1	-1.20568	6.68378	-2.83662	0.0152904	-4.21415
384	CUL2	-1.19843	7.1371	-2.83597	0.0153086	-4.21429
385	ZWILCH	-1.90375	6.083	-2.83448	0.0153507	-4.2146
386	ST7L	-1.09406	5.79052	-2.8325	0.0154066	-4.21501
387	CENPK	-1.55419	5.9029	-2.82993	0.0154796	-4.21554
388	EIF3M	-1.35833	6.47577	-2.82661	0.0155745	-4.21624
389	EPB41L5	-1.30393	6.65517	-2.8261	0.0155889	-4.21634
390	SKIL	-1.49905	4.91048	-2.82498	0.015621	-4.21657
391	LTN1	-1.46215	5.42342	-2.82445	0.0156362	-4.21669
392	LOC100506297	-1.63768	6.22798	-2.82254	0.0156913	-4.21708
393	LYZL1	-1.09688	3.4355	-2.82079	0.015742	-4.21745
394	KIAA1109	-1.13398	6.05443	-2.81929	0.0157852	-4.21776
395	MAPKAPK2	-1.33692	5.52815	-2.8191	0.0157909	-4.2178
396	SNX9	-1.07293	6.72449	-2.81834	0.0158129	-4.21796
397	STAM	-1.30449	5.20087	-2.81742	0.0158397	-4.21815
398	DHX36	-1.05145	6.59105	-2.817	0.0158518	-4.21824
399	ARIH1	-1.06226	7.92774	-2.81623	0.0158742	-4.2184
400	B4GALT5	-1.68251	6.19573	-2.81373	0.0159475	-4.21892
401	MCL1	-1.60324	6.35784	-2.81305	0.0159675	-4.21907
402	SLC12A6	-1.15227	6.23362	-2.81216	0.0159935	-4.21925
403	VMP1	-1.32914	7.44251	-2.81131	0.0160185	-4.21943
404	GPBP1	-1.03836	6.8805	-2.81016	0.0160524	-4.21967
405	NFU1	-1.25726	5.44543	-2.80931	0.0160773	-4.21985
406	NF1	-1.1886	6.25725	-2.80918	0.0160812	-4.21987
407	AGPS	-1.32321	4.10208	-2.80758	0.0161287	-4.22021
408	RBM44	-1.14487	4.6077	-2.80595	0.0161771	-4.22055
409	MASTL	-1.11434	5.38169	-2.80525	0.0161978	-4.2207
410	NUP160	-1.22669	5.18501	-2.80506	0.0162036	-4.22074
411	RASA2	-1.03656	4.13706	-2.80303	0.0162642	-4.22116
412	IFT88	-1.63968	5.94719	-2.80267	0.0162748	-4.22124
413	ZNF292	-1.34551	4.4862	-2.80012	0.0163511	-4.22177
414	ABI2	-1.11011	6.65246	-2.79727	0.0164371	-4.22237
415	C1orf43	-1.10709	7.60557	-2.79591	0.0164782	-4.22265
416	SMURF2	-1.92346	5.68733	-2.79315	0.016562	-4.22323
417	MAK	-1.35346	5.59876	-2.79203	0.016596	-4.22347
418	KIAA0564	-1.23495	5.7486	-2.79127	0.0166193	-4.22363
419	DPP8	-1.32816	5.73649	-2.7877	0.0167285	-4.22438
420	USP47	-1.02846	4.88837	-2.78734	0.0167398	-4.22445
421	GPATCH8	-1.01112	5.3938	-2.78627	0.0167726	-4.22468
422	SEC24B	-1.25624	7.3212	-2.78575	0.0167887	-4.22479
423	TM9SF2	-1.55215	6.99055	-2.78451	0.0168269	-4.22505
424	POTEE	-1.51382	5.89698	-2.78445	0.0168287	-4.22506
425	SETD2	-1.05002	5.71204	-2.7842	0.0168365	-4.22511
426	XRN2	-1.31575	4.91184	-2.78368	0.0168525	-4.22522
427	C11orf68	-1.17563	5.51245	-2.7832	0.0168676	-4.22532
428	RB1	-1.20241	5.52818	-2.78158	0.0169179	-4.22566
429	SOS2	-1.28223	6.39686	-2.78103	0.0169349	-4.22578
430	NAMPTL	-2.89572	6.45694	-2.78097	0.0169366	-4.22579
431	NHLRC2	-1.0228	5.49688	-2.78046	0.0169526	-4.2259
432	HOOK3	-1.05418	4.4386	-2.78005	0.0169654	-4.22598
433	LPAR3	-1.11145	5.61907	-2.77978	0.0169737	-4.22604
434	MIB1	-1.168	6.38204	-2.7791	0.0169948	-4.22618
435	RAPGEF6	-1.28682	5.17754	-2.7771	0.0170577	-4.2266
436	SRP72	-1.53216	6.1425	-2.77589	0.0170954	-4.22686
437	FBXL3	-1.10973	3.87986	-2.7735	0.0171707	-4.22736
438	HNRNPU-AS1	-1.09014	4.61659	-2.77262	0.0171985	-4.22755
439	L3MBTL4	-1.26709	6.06586	-2.77164	0.0172293	-4.22775
440	NSFP1	-1.36648	7.17775	-2.77077	0.017257	-4.22794
441	SAT1	-2.47815	6.87676	-2.77023	0.017274	-4.22805
442	FAM126A	-1.55019	6.78592	-2.76958	0.0172949	-4.22819
443	ATG4C	-1.29369	5.41715	-2.76768	0.0173552	-4.22859
444	KIF2A	-1.31391	6.30133	-2.76689	0.0173803	-4.22875
445	CYB5R4	-1.61248	7.76374	-2.76458	0.0174541	-4.22924
446	SLC25A46	-1.30387	6.09351	-2.76343	0.0174912	-4.22948
447	DENND4A	-1.07641	5.73007	-2.76152	0.0175526	-4.22989
448	ANKRD13A	-1.07197	8.36989	-2.75926	0.0176257	-4.23036
449	FBXO30	-1.30425	4.49953	-2.75339	0.0178166	-4.2316
450	USP7	-1.50287	6.69066	-2.75166	0.0178733	-4.23197
451	PIBF1	-1.17386	5.04025	-2.7498	0.0179344	-4.23236
452	CFTR	-1.17114	6.09997	-2.74824	0.0179856	-4.23269
453	MAN1A1	-1.0039	4.76322	-2.74801	0.0179935	-4.23274
454	IQGAP2	-1.06747	6.37874	-2.74512	0.0180891	-4.23335
455	LMAN1	-1.50482	4.95571	-2.74469	0.0181032	-4.23344
456	MYO9A	-1.29964	7.31829	-2.74377	0.0181339	-4.23364
457	AQP9	-3.21569	5.61284	-2.74189	0.0181967	-4.23403
458	FBXO34	-1.39071	5.90845	-2.74113	0.018222	-4.23419
459	PRKCD	-1.14021	6.48119	-2.74034	0.0182485	-4.23436
460	ATP1B3	-1.50208	7.49709	-2.73759	0.0183407	-4.23494
461	GPSM2	-1.24943	6.09882	-2.73624	0.0183861	-4.23523
462	WSB1	-1.53571	6.55037	-2.73381	0.0184683	-4.23574
463	USO1	-1.32564	4.69124	-2.73058	0.0185783	-4.23643
464	NCOA4	-1.655	6.92158	-2.73011	0.0185943	-4.23653
465	TBC1D12	-1.03476	4.56837	-2.72945	0.0186169	-4.23667
466	CTR9	-1.18336	4.99356	-2.72944	0.0186172	-4.23667
467	ATPAF1	-1.17044	6.43149	-2.72884	0.0186375	-4.2368
468	IFT52	-1.28041	4.72687	-2.72781	0.0186727	-4.23702
469	KNTC1	-1.27893	5.49954	-2.72594	0.0187372	-4.23742
470	MTX1	-1.12186	5.67039	-2.72381	0.0188104	-4.23787
471	RPN2	-1.21795	5.44666	-2.72339	0.0188251	-4.23796
472	CRY1	-1.0917	5.43655	-2.72253	0.0188545	-4.23814
473	MIR3064	-1.66419	7.28692	-2.72252	0.0188551	-4.23814
474	IFNAR1	-1.70728	4.6905	-2.72224	0.0188648	-4.2382
475	DMXL2	-1.39559	6.14333	-2.72199	0.0188734	-4.23825
476	MSH4	-1.5924	4.93051	-2.72127	0.0188984	-4.23841
477	CSMD3	-1.0312	4.80847	-2.72078	0.0189154	-4.23851
478	REPS1	-1.06249	5.89668	-2.72029	0.0189323	-4.23861
479	BTBD10	-1.01037	5.63983	-2.71879	0.0189843	-4.23893
480	CNGB3	-1.14464	6.40968	-2.71822	0.0190044	-4.23905
481	C9orf129	-1.70775	5.30122	-2.71775	0.0190207	-4.23915
482	ANKIB1	-1.16703	7.20897	-2.71573	0.0190912	-4.23958
483	PLCXD2-AS1	-2.16275	7.29477	-2.71438	0.0191387	-4.23987
484	NCOA1	-1.36424	6.32248	-2.71223	0.0192143	-4.24033
485	OTUD7B	-1.12313	4.75178	-2.70796	0.0193652	-4.24124
486	ERMP1	-1.48777	5.45587	-2.70749	0.0193819	-4.24134
487	CPEB4	-1.01887	4.54091	-2.7062	0.0194278	-4.24161
488	USP32	-1.52676	6.76374	-2.70542	0.0194557	-4.24178
489	MED13L	-1.23946	5.71705	-2.70439	0.0194925	-4.242
490	DDX6	-1.11179	5.571	-2.70407	0.019504	-4.24207
491	STXBP5	-1.40283	7.0611	-2.70387	0.019511	-4.24211
492	PKN2	-1.04094	5.01564	-2.70173	0.0195878	-4.24256
493	CPEB2	-1.5616	6.12476	-2.70002	0.0196494	-4.24293
494	TMEM181	-1.17709	4.90661	-2.69076	0.0199856	-4.2449
495	SCP2	-1.29291	5.21834	-2.69075	0.0199862	-4.24491
496	HEXB	-1.2481	5.22946	-2.69065	0.0199898	-4.24493
497	SDAD1	-1.3174	5.88006	-2.68816	0.0200812	-4.24546
498	RALGAPA1	-1.101	6.24742	-2.68788	0.0200916	-4.24552
499	RALGAPA1P	-1.101	6.24742	-2.68788	0.0200916	-4.24552
500	CCDC23	-1.53905	5.84204	-2.68671	0.0201345	-4.24577
501	TMCO2	-1.76605	6.8094	-2.68363	0.0202485	-4.24643
502	RAD51AP1	-1.26763	4.96836	-2.68362	0.0202489	-4.24643
503	NEK3	-1.20699	5.14874	-2.68305	0.0202702	-4.24655
504	VTA1	-1.13829	5.63252	-2.67472	0.020582	-4.24833
505	PIGN	-1.72527	4.84663	-2.67215	0.0206791	-4.24888
506	AKTIP	-1.39493	6.94365	-2.67157	0.0207011	-4.24901
507	LOC100130746	-1.39493	6.94365	-2.67157	0.0207011	-4.24901
508	ADAMTSL3	-1.23376	5.56461	-2.67064	0.0207363	-4.24921
509	SLC41A2	-1.12863	5.08954	-2.66941	0.0207832	-4.24947
510	THAP9	-1.47247	5.06298	-2.66806	0.0208344	-4.24976
511	ND6	-1.20458	6.05163	-2.66655	0.0208922	-4.25008
512	LOC100506071	-1.15528	5.34901	-2.66553	0.0209312	-4.2503
513	RALGAPB	-1.00682	6.59104	-2.66141	0.0210899	-4.25118
514	RSPH10B	-1.02165	5.81394	-2.66012	0.0211398	-4.25146
515	NPAT	-1.03458	4.90688	-2.65914	0.0211776	-4.25167
516	TOMM22	-1.39635	5.84384	-2.65812	0.0212174	-4.25189
517	FEM1C	-1.27145	6.82145	-2.65581	0.0213073	-4.25239
518	CAMLG	-1.81671	6.84436	-2.65393	0.0213808	-4.25279
519	PPP1CC	-1.17281	5.03334	-2.64888	0.0215792	-4.25387
520	ANKRD50	-1.05984	6.61971	-2.64888	0.0215793	-4.25387
521	LOC100130964	-2.13142	4.63276	-2.64871	0.0215859	-4.25391
522	PHLPP2	-1.49661	6.38593	-2.64806	0.0216118	-4.25405
523	DUSP11	-1.04579	5.07576	-2.6452	0.021725	-4.25466
524	SCYL2	-1.12024	4.38968	-2.64416	0.0217664	-4.25489
525	MT1X	-1.5751	9.18892	-2.64245	0.0218348	-4.25526
526	LOC100128252	-1.12479	7.97633	-2.6424	0.0218369	-4.25527
527	LOC100288114	-1.12479	7.97633	-2.6424	0.0218369	-4.25527
528	RNF13	-1.53792	5.75771	-2.63909	0.0219694	-4.25598
529	ZNF766	-1.87978	6.37932	-2.63877	0.0219826	-4.25605
530	SLC44A2	-1.32231	6.36234	-2.6387	0.0219851	-4.25606
531	BAI3	-1.01823	5.12721	-2.63818	0.0220063	-4.25618
532	KLK13	-1.48581	6.40966	-2.63761	0.022029	-4.2563
533	NDFIP2	-1.44634	6.67065	-2.63284	0.022222	-4.25732
534	USP14	-1.27072	6.0102	-2.62798	0.0224205	-4.25837
535	RAD17	-1.17421	5.89674	-2.62513	0.022538	-4.25899
536	TTC33	-1.32867	5.41649	-2.62457	0.0225611	-4.25911
537	C1orf9	-1.25861	6.14162	-2.6245	0.022564	-4.25912
538	SEC61A2	-1.138	5.6377	-2.62256	0.0226439	-4.25954
539	SNRPD2P2	-1.12737	5.28701	-2.62149	0.0226885	-4.25977
540	MIPOL1	-1.1782	5.15547	-2.62039	0.0227341	-4.26001
541	HSPA4	-1.31881	5.17895	-2.61938	0.022776	-4.26023
542	SLCO6A1	-1.31087	6.19791	-2.61918	0.0227845	-4.26027
543	RBBP8	-1.05882	5.41507	-2.6186	0.0228087	-4.2604
544	ATXN10	-1.16311	5.98465	-2.61643	0.0228992	-4.26086
545	GNAI3	-1.11372	4.81012	-2.60806	0.0232525	-4.26267
546	ACSL1	-1.53729	7.09473	-2.60662	0.023314	-4.26299
547	CCDC79	-1.6591	6.26867	-2.60609	0.0233362	-4.2631
548	PTPN13	-1.17346	5.34276	-2.60539	0.0233661	-4.26325
549	SIN3A	-1.13282	6.06389	-2.60534	0.0233683	-4.26326
550	HACE1	-1.11933	6.05984	-2.60377	0.0234356	-4.2636
551	MLL5	-1.19262	6.40348	-2.6034	0.0234513	-4.26368
552	KIF3A	-1.0613	4.70859	-2.6022	0.0235028	-4.26394
553	IFT74	-1.43254	5.56584	-2.60046	0.0235777	-4.26432
554	LOC100505619	-1.1447	5.23648	-2.60029	0.0235851	-4.26435
555	DHX32	-1.53662	5.96449	-2.59696	0.023729	-4.26508
556	ZFP106	-1.14998	5.34442	-2.59377	0.0238676	-4.26577
557	STARD6	-1.89287	5.80986	-2.59168	0.0239591	-4.26622
558	HAUS6	-1.01832	4.98274	-2.59158	0.0239636	-4.26624
559	C6orf72	-1.7225	6.92814	-2.58855	0.0240964	-4.2669
560	USP1	-1.63801	5.55007	-2.58719	0.0241564	-4.26719
561	DUSP4	-1.15581	5.24656	-2.58366	0.0243127	-4.26796
562	TMTC3	-1.58781	6.18199	-2.58332	0.0243276	-4.26803
563	PPAP2A	-1.29357	6.83125	-2.58304	0.0243401	-4.26809
564	POLK	-1.12098	5.5754	-2.58251	0.024364	-4.26821
565	S100A8	-1.27296	5.48231	-2.5825	0.0243644	-4.26821
566	CYB5D1	-1.18961	5.66338	-2.58143	0.0244118	-4.26844
567	ARFGAP3	-1.21291	5.74831	-2.57859	0.024539	-4.26906
568	KIAA0494	-1.365	6.68977	-2.57665	0.0246259	-4.26948
569	RALGAPA2	-1.0619	5.31297	-2.57656	0.0246301	-4.2695
570	PTPN1	-1.04432	5.73114	-2.57625	0.0246438	-4.26957
571	XRN1	-1.05731	6.40471	-2.57501	0.0246998	-4.26984
572	SLC25A37	-1.18293	5.92816	-2.57485	0.0247072	-4.26987
573	HHLA2	-1.28402	5.60611	-2.57281	0.0247994	-4.27032
574	PRKRA	-1.36693	6.22833	-2.57196	0.0248378	-4.2705
575	SLC30A1	-1.3324	5.87249	-2.56763	0.0250347	-4.27144
576	NSUN7	-1.1496	7.29296	-2.56689	0.0250686	-4.2716
577	FBXO47	-1.1606	5.0307	-2.56506	0.0251524	-4.272
578	DPM1	-1.44707	6.28218	-2.56347	0.0252257	-4.27235
579	SYNCRIP	-1.09207	6.37272	-2.56226	0.0252813	-4.27261
580	C9orf43	-1.26462	6.81096	-2.56208	0.0252898	-4.27265
581	ZDHHC13	-1.16385	5.64182	-2.56191	0.0252973	-4.27268
582	C14orf39	-1.1007	4.75241	-2.56166	0.025309	-4.27274
583	CLIC4	-1.11383	5.35821	-2.56032	0.0253713	-4.27303
584	MCMDC2	-1.64822	6.23852	-2.55593	0.0255753	-4.27399
585	GKAP1	-1.34459	6.57816	-2.55277	0.0257228	-4.27467
586	RNF11	-1.49901	7.38952	-2.55102	0.0258052	-4.27506
587	MT1JP	-1.98714	5.14503	-2.5508	0.0258156	-4.27511
588	AKD1	-1.14885	5.61513	-2.5498	0.0258626	-4.27532
589	TM4SF20	-1.43893	4.05531	-2.54974	0.0258654	-4.27534
590	XRCC5	-1.16327	6.95429	-2.54624	0.0260311	-4.2761
591	PI4KAP1	-1.26724	6.01619	-2.5457	0.0260568	-4.27622
592	PSMA8	-1.12437	3.83683	-2.54554	0.0260643	-4.27625
593	SESN3	-1.659	5.81682	-2.54533	0.0260744	-4.2763
594	TRGJP2	-1.85603	4.78581	-2.54498	0.026091	-4.27637
595	OTUD4	-1.00966	5.92291	-2.54491	0.0260945	-4.27639
596	BUB3	-1.06107	5.64656	-2.5448	0.0260996	-4.27641
597	CPEB3	-1.50073	6.8515	-2.54347	0.026163	-4.2767
598	EIF2S2	-1.18075	6.43951	-2.54301	0.0261847	-4.2768
599	EIF2S2P3	-1.18075	6.43951	-2.54301	0.0261847	-4.2768
600	GOLGA4	-1.16766	5.7275	-2.54075	0.0262928	-4.2773
601	ZRANB1	-1.40426	8.06145	-2.53477	0.0265814	-4.2786
602	GFPT1	-1.48126	7.25866	-2.534	0.0266187	-4.27877
603	TOPBP1	-1.03193	6.7239	-2.52972	0.0268271	-4.27971
604	PPM1E	-1.32418	4.90067	-2.5282	0.0269012	-4.28004
605	APOBEC4	-1.38498	6.99947	-2.52811	0.0269057	-4.28006
606	JAK2	-1.40213	7.36268	-2.52704	0.0269583	-4.28029
607	C10orf115	-1.41012	4.96031	-2.52641	0.026989	-4.28043
608	FAM49B	-1.58154	4.962	-2.5261	0.0270044	-4.2805
609	ROCK1	-1.35554	5.39359	-2.52504	0.0270569	-4.28073
610	LOC100507246	-1.19717	5.54567	-2.524	0.0271077	-4.28096
611	ZNF267	-1.55319	3.99114	-2.52367	0.0271241	-4.28103
612	ARL5B	-1.30413	6.95152	-2.52222	0.0271962	-4.28135
613	UBE4A	-1.12551	6.17403	-2.52012	0.0273001	-4.2818
614	TTN-AS1	-1.05659	5.53362	-2.51807	0.0274025	-4.28225
615	LRGUK	-1.27271	6.04485	-2.51564	0.027524	-4.28279
616	IFI30	-1.92782	7.4988	-2.51553	0.0275295	-4.28281
617	SKIV2L2	-1.18095	5.10544	-2.51434	0.0275892	-4.28307
618	SOS1	-1.03374	4.61205	-2.51412	0.0276002	-4.28312
619	TRAM1	-1.39763	6.25166	-2.51198	0.0277079	-4.28359
620	FAM63A	-1.18279	5.78495	-2.51184	0.0277148	-4.28362
621	PTPN4	-1.10146	4.91678	-2.51157	0.0277286	-4.28368
622	DONSON	-1.42081	5.45648	-2.51048	0.0277839	-4.28392
623	FER	-1.46083	6.04216	-2.50769	0.0279251	-4.28453
624	SMAD2	-1.09766	7.91459	-2.50418	0.0281041	-4.2853
625	NABP1	-1.71046	5.47599	-2.5036	0.0281339	-4.28542
626	ARHGEF7-AS1	-1.59991	5.77298	-2.50221	0.0282052	-4.28573
627	NEDD1	-1.23837	6.48875	-2.50093	0.0282707	-4.28601
628	LSAMP-AS3	-1.13049	4.84072	-2.50053	0.0282912	-4.2861
629	PAK2	-1.08643	4.65008	-2.49933	0.0283536	-4.28636
630	DNAH14	-1.43082	5.4771	-2.49756	0.028445	-4.28675
631	ANKRD5	-1.21769	5.8959	-2.49387	0.0286363	-4.28756
632	ERRFI1	-1.2123	5.51753	-2.49304	0.0286799	-4.28774
633	NUSAP1	-1.34006	5.85708	-2.48573	0.0290636	-4.28935
634	SLC38A2	-1.75988	5.94248	-2.4844	0.0291341	-4.28964
635	UBE2D3	-1.18835	5.28013	-2.48435	0.0291367	-4.28965
636	FOPNL	-1.47323	6.91125	-2.48241	0.0292393	-4.29008
637	IL1A	-2.33398	5.86078	-2.48007	0.0293638	-4.29059
638	TUBGCP4	-1.4023	6.13374	-2.47944	0.0293975	-4.29073
639	FAM217A	-1.11414	5.25529	-2.47938	0.0294009	-4.29074
640	FUT8	-1.29885	6.02041	-2.47932	0.029404	-4.29076
641	PLXDC2	-1.52591	6.35625	-2.47886	0.029429	-4.29086
642	SMC6	-1.11044	6.36267	-2.47879	0.0294326	-4.29087
643	EYA4	-1.0717	4.18103	-2.4776	0.0294965	-4.29114
644	CUL4B	-1.16425	6.36957	-2.47754	0.0294992	-4.29115
645	DRAM1	-1.22591	4.28525	-2.47744	0.0295049	-4.29117
646	BRIP1	-1.38231	6.04991	-2.47735	0.0295095	-4.29119
647	VAMP4	-1.1474	4.98827	-2.47724	0.0295154	-4.29121
648	THOC1	-1.1417	4.97162	-2.47709	0.0295235	-4.29125
649	KLHL12	-1.17946	4.67583	-2.47701	0.0295281	-4.29126
650	NSF	-1.28448	6.83334	-2.47673	0.029543	-4.29133
651	USP16	-1.36979	5.00285	-2.47514	0.0296284	-4.29168
652	CLOCK	-1.25628	6.5117	-2.47512	0.0296295	-4.29168
653	NBAS	-1.44466	6.49495	-2.47099	0.0298529	-4.29259
654	FAM208B	-1.09948	5.36818	-2.46896	0.0299632	-4.29304
655	KANSL1L	-1.05195	5.70927	-2.46758	0.0300384	-4.29334
656	MT1E	-1.4482	5.73544	-2.46636	0.0301049	-4.29361
657	CDKL4	-1.19574	3.78589	-2.46355	0.030259	-4.29423
658	CCDC168	-2.69993	5.66534	-2.457	0.0306207	-4.29567
659	SLC38A1	-1.21466	4.83829	-2.45699	0.0306216	-4.29567
660	LOC100505750	-1.32963	5.61325	-2.45558	0.0306999	-4.29598
661	BAG5	-1.23332	6.568	-2.45501	0.030732	-4.29611
662	OLFM2	-1.58995	6.85862	-2.45491	0.0307371	-4.29613
663	C2orf69	-1.08356	4.90067	-2.45362	0.0308094	-4.29642
664	RUNDC3A	-1.31741	6.96761	-2.45091	0.0309614	-4.29701
665	CD55	-1.4205	6.49559	-2.44776	0.0311385	-4.29771
666	TDRD10	-1.10553	5.60111	-2.44562	0.0312597	-4.29818
667	PLEK	-2.19958	5.81236	-2.44272	0.031425	-4.29882
668	LIG3	-1.14798	4.44672	-2.44147	0.0314962	-4.2991
669	TXNL1	-1.25086	7.23287	-2.439	0.0316379	-4.29964
670	PEF1	-1.08515	5.47769	-2.43398	0.0319269	-4.30075
671	APLP2	-1.1917	6.34762	-2.43326	0.0319685	-4.30091
672	ALOX5AP	-1.65147	5.7997	-2.43009	0.0321527	-4.30161
673	SNX16	-1.26731	4.77532	-2.42908	0.032212	-4.30184
674	LINC00174	-1.24362	4.87501	-2.4289	0.0322226	-4.30188
675	FANCM	-1.22251	4.52501	-2.42639	0.0323693	-4.30243
676	ACAT2	-1.02913	5.05837	-2.42593	0.0323963	-4.30253
677	DDX19B	-1.36723	5.25498	-2.4256	0.0324155	-4.30261
678	KIF5B	-1.52304	7.11485	-2.42214	0.0326193	-4.30337
679	LINC00347	-1.59763	5.66475	-2.42154	0.032655	-4.3035
680	HLA-DRA	-1.88686	7.33863	-2.42131	0.0326686	-4.30355
681	RALGPS2	-1.36164	7.21421	-2.42094	0.0326908	-4.30364
682	VAMP7	-1.26642	5.55148	-2.41994	0.0327498	-4.30386
683	IFLTD1	-1.37831	5.72728	-2.41981	0.0327575	-4.30389
684	LOC338579	-1.46175	4.8086	-2.41933	0.0327861	-4.30399
685	ASXL2	-1.16022	6.32399	-2.41676	0.0329389	-4.30456
686	C15orf48	-1.5717	5.47416	-2.41393	0.0331083	-4.30519
687	MIR147B	-1.5717	5.47416	-2.41393	0.0331083	-4.30519
688	LIFR	-1.10928	6.25826	-2.41371	0.0331217	-4.30524
689	ACTR6	-1.02077	3.57024	-2.41328	0.0331475	-4.30533
690	CAMSAP2	-1.03925	6.84293	-2.41312	0.033157	-4.30537
691	GLIPR1	-1.05108	5.57889	-2.41261	0.0331877	-4.30548
692	LYZ	-1.2303	7.11251	-2.40932	0.0333858	-4.30621
693	SNX13	-1.02207	7.11152	-2.40911	0.0333985	-4.30626
694	BVES	-1.15708	7.65959	-2.40529	0.0336299	-4.3071
695	NEK4	-1.07605	5.87799	-2.40318	0.0337591	-4.30757
696	DDX3Y	-1.1248	6.40091	-2.40052	0.0339216	-4.30816
697	SLC25A40	-1.10769	7.87671	-2.40039	0.0339298	-4.30819
698	ZDBF2	-1.60377	6.10579	-2.3965	0.0341692	-4.30905
699	NPC1	-1.08121	4.74549	-2.39364	0.0343468	-4.30969
700	OSGIN2	-1.10326	5.88497	-2.38757	0.0347255	-4.31103
701	SLC39A6	-1.07667	5.94441	-2.38524	0.0348721	-4.31155
702	SWT1	-1.52528	6.29554	-2.38462	0.0349113	-4.31169
703	FLJ43681	-1.05726	3.86971	-2.3845	0.0349192	-4.31172
704	MLL3	-1.06445	6.45547	-2.38346	0.034985	-4.31195
705	APLF	-1.02439	6.89937	-2.38285	0.035023	-4.31208
706	CYBB	-2.15981	6.70302	-2.38075	0.0351566	-4.31255
707	ZRANB3	-1.06025	4.97037	-2.38014	0.0351951	-4.31268
708	PRKD3	-1.13172	6.19363	-2.37936	0.035245	-4.31286
709	TNPO1	-1.14721	6.50302	-2.37928	0.03525	-4.31288
710	LOC100129055	-1.03244	3.44723	-2.3789	0.0352739	-4.31296
711	AGBL2	-1.31353	6.00066	-2.37877	0.0352827	-4.31299
712	NETO2	-1.14469	5.06491	-2.37819	0.0353198	-4.31312
713	FBXL13	-1.12561	8.24659	-2.37782	0.0353432	-4.3132
714	SYCP1	-1.40127	5.69432	-2.37652	0.035426	-4.31349
715	RARS2	-1.01484	5.8972	-2.37597	0.0354614	-4.31361
716	BCL2A1	-1.85925	6.15371	-2.37277	0.0356673	-4.31432
717	TMEM67	-1.22313	5.26168	-2.36934	0.0358884	-4.31509
718	FAM71C	-2.01089	6.20145	-2.36817	0.0359649	-4.31535
719	NAMPT	-2.34915	5.43072	-2.36643	0.0360776	-4.31573
720	NAA16	-1.0078	4.58331	-2.36577	0.0361207	-4.31588
721	UFSP2	-1.25684	5.9851	-2.36554	0.0361358	-4.31593
722	FAM195A	-1.11292	5.39149	-2.36543	0.0361433	-4.31596
723	CSGALNACT2	-1.10519	4.64462	-2.36243	0.0363391	-4.31662
724	UQCR10	-1.36146	7.07986	-2.36193	0.0363719	-4.31673
725	RIOK3	-1.18276	8.11881	-2.36132	0.0364121	-4.31687
726	ERLEC1	-1.37161	5.16836	-2.3607	0.0364528	-4.31701
727	CEP350	-1.3043	6.68658	-2.36065	0.0364561	-4.31702
728	CTSS	-1.84787	6.02354	-2.35999	0.0364996	-4.31717
729	MIS12	-1.24773	7.10121	-2.35962	0.0365239	-4.31725
730	PARP4	-1.03419	5.88343	-2.35777	0.036646	-4.31766
731	AP1G1	-1.0002	6.38452	-2.35626	0.0367462	-4.318
732	WWP2	-1.12884	5.33166	-2.35559	0.0367905	-4.31815
733	ANO7L1	-1.18738	4.50655	-2.35548	0.0367977	-4.31817
734	TEX26	-1.17262	6.53601	-2.35547	0.0367988	-4.31817
735	LRRC63	-1.21397	5.4813	-2.35292	0.036968	-4.31874
736	ADAM29	-1.22947	5.62801	-2.35146	0.0370658	-4.31907
737	H3F3B	-1.01052	6.59606	-2.34927	0.0372121	-4.31955
738	H3F3A	-1.01052	6.59606	-2.34927	0.0372121	-4.31955
739	CTNS	-1.07744	5.37357	-2.34619	0.0374198	-4.32024
740	WBP2NL	-1.03728	5.56096	-2.34582	0.0374445	-4.32032
741	HAUS2	-1.08458	4.94896	-2.34556	0.0374625	-4.32038
742	PTBP3	-1.06618	7.92393	-2.34533	0.0374774	-4.32043
743	BTBD1	-1.20167	5.24485	-2.34101	0.0377704	-4.32139
744	RGCC	-1.37872	5.34997	-2.33965	0.0378637	-4.3217
745	TANK	-1.13758	4.04832	-2.33927	0.0378892	-4.32178
746	VIM	-1.09364	5.80427	-2.33887	0.0379164	-4.32187
747	CSE1L	-1.08979	8.05868	-2.33846	0.0379446	-4.32196
748	NUDT4P1	-1.20719	4.40843	-2.33731	0.0380233	-4.32222
749	CNTRL	-1.00462	5.55781	-2.33621	0.0380989	-4.32247
750	YEATS4	-1.21588	4.7716	-2.33498	0.0381836	-4.32274
751	FAM75D5	-1.671	6.18871	-2.33453	0.0382146	-4.32284
752	EHBP1	-1.14193	7.26009	-2.33376	0.0382671	-4.32301
753	RNY4P4	-1.04677	3.66456	-2.33221	0.0383745	-4.32336
754	MYCBPAP	-1.04886	5.65335	-2.33219	0.0383756	-4.32336
755	SCARNA6	-1.38088	4.84302	-2.33184	0.0383998	-4.32344
756	CD24	-1.3837	5.37445	-2.33132	0.0384356	-4.32356
757	COPS2	-1.28415	6.46048	-2.33123	0.0384419	-4.32358
758	DZIP3	-1.00897	6.11884	-2.33001	0.0385267	-4.32385
759	RPL23AP4	-1.22708	4.2599	-2.32972	0.038547	-4.32391
760	C6orf62	-1.18488	6.09486	-2.32961	0.0385543	-4.32394
761	ZCCHC2	-1.08282	7.06858	-2.32893	0.0386019	-4.32409
762	CATSPERB	-1.56473	4.4657	-2.32848	0.0386327	-4.32419
763	VTI1B	-1.20569	7.29575	-2.32682	0.0387485	-4.32456
764	INSIG1	-1.13746	5.67909	-2.32169	0.0391082	-4.32571
765	SLC30A4	-1.04919	5.95988	-2.32067	0.0391797	-4.32593
766	MSL3P1	-1.38705	5.33483	-2.32033	0.0392037	-4.32601
767	ELP4	-1.01658	5.34426	-2.31935	0.0392729	-4.32623
768	KRIT1	-1.25355	6.1288	-2.31805	0.0393653	-4.32652
769	RBM26	-1.06432	4.94021	-2.31788	0.0393769	-4.32656
770	ATP6V0A1	-1.06629	4.69897	-2.31745	0.0394077	-4.32665
771	FAM179B	-1.02213	5.76662	-2.31689	0.0394475	-4.32678
772	NFIL3	-1.4751	5.02726	-2.31577	0.0395268	-4.32703
773	XPO7	-1.15038	6.80347	-2.31562	0.0395378	-4.32706
774	UBE2U	-1.37921	7.86645	-2.31475	0.0395994	-4.32726
775	SUV39H2	-1.52899	5.62005	-2.31376	0.0396703	-4.32748
776	UCHL3	-1.09634	6.13983	-2.31064	0.0398933	-4.32818
777	PPP2R3C	-1.55383	5.24062	-2.30581	0.0402411	-4.32925
778	PSMC2	-1.0103	5.71202	-2.30563	0.0402546	-4.3293
779	VEZF1	-1.009	5.90183	-2.3051	0.040293	-4.32941
780	KPNA3	-1.0556	7.46867	-2.30464	0.040326	-4.32952
781	SNORD89	-1.11454	5.462	-2.30427	0.0403528	-4.3296
782	NFKBIZ	-1.59348	5.46534	-2.30415	0.0403617	-4.32963
783	CD47	-1.48746	5.47905	-2.30294	0.0404497	-4.3299
784	ARF4	-1.29347	6.37121	-2.30191	0.0405245	-4.33013
785	MTX2	-1.02009	5.45018	-2.30078	0.0406066	-4.33038
786	DDX4	-1.31137	6.13732	-2.30006	0.0406594	-4.33054
787	SMC2	-1.0578	4.92684	-2.29883	0.0407496	-4.33082
788	DPY19L2P2	-1.05942	4.34512	-2.2974	0.0408545	-4.33114
789	IL1RN	-1.42176	6.56886	-2.29721	0.0408679	-4.33118
790	ARCN1	-1.20114	5.91234	-2.29719	0.0408694	-4.33118
791	CALR3	-1.50503	7.21203	-2.29699	0.0408844	-4.33123
792	LOC441601	-1.63838	6.11268	-2.29559	0.040987	-4.33154
793	TMEM50A	-1.51515	6.89142	-2.29337	0.0411511	-4.33204
794	FAM89B	-1.07296	8.18045	-2.29174	0.0412718	-4.3324
795	PRRC2C	-1.04915	7.34344	-2.28835	0.0415234	-4.33316
796	CEP112	-1.17152	6.14129	-2.28395	0.0418529	-4.33415
797	OXCT2	-1.60388	5.63148	-2.28276	0.0419422	-4.33441
798	NUFIP1	-1.01993	4.72282	-2.28245	0.0419655	-4.33448
799	SEMG1	-2.42665	8.01921	-2.28151	0.0420362	-4.33469
800	LAMP2	-1.44354	4.30521	-2.27744	0.0423442	-4.3356
801	POLB	-1.31953	6.7984	-2.27727	0.0423574	-4.33564
802	RNF133	-1.15738	5.55686	-2.27658	0.0424103	-4.3358
803	NTAN1	-1.03642	5.99693	-2.27463	0.0425582	-4.33623
804	DNM3-IT1	-1.08978	5.85633	-2.27365	0.0426336	-4.33645
805	C22orf43	-1.39995	6.5907	-2.27348	0.0426467	-4.33649
806	CDADC1	-1.02511	4.93599	-2.27122	0.0428194	-4.337
807	SLC35A1	-1.22666	6.06356	-2.27111	0.0428283	-4.33702
808	PIGT	-1.30589	7.43939	-2.2707	0.0428592	-4.33711
809	ANKRD60	-1.13219	4.67879	-2.26985	0.0429247	-4.3373
810	HSD17B4	-1.13054	5.87434	-2.26567	0.0432476	-4.33824
811	QSER1	-1.12976	5.3997	-2.26502	0.0432979	-4.33839
812	AHR	-1.20019	5.52161	-2.2642	0.0433618	-4.33857
813	DEXI	-1.05563	5.74383	-2.26383	0.0433905	-4.33865
814	PPP1R15B	-1.44772	5.88177	-2.26315	0.043443	-4.33881
815	FCER1G	-1.77089	6.68908	-2.25661	0.0439554	-4.34027
816	SECISBP2	-1.02054	7.83423	-2.25371	0.0441842	-4.34092
817	LOC100507699	-1.01744	6.23872	-2.2536	0.0441925	-4.34095
818	RANBP17	-1.05059	5.72772	-2.25359	0.0441935	-4.34095
819	MED13	-1.27526	8.57205	-2.25146	0.044362	-4.34143
820	C1orf141	-1.29076	5.74443	-2.2499	0.0444866	-4.34178
821	ATP13A3	-1.27909	5.24605	-2.24958	0.044512	-4.34185
822	LOC100507033	-1.27909	5.24605	-2.24958	0.044512	-4.34185
823	PITPNA	-1.09452	7.72797	-2.24951	0.0445172	-4.34187
824	XKR9	-1.16576	4.37119	-2.24941	0.0445252	-4.34189
825	AARS	-1.01277	5.63801	-2.24815	0.0446257	-4.34217
826	REL	-1.39738	6.67419	-2.24486	0.0448893	-4.34291
827	CEP76	-1.35011	5.60458	-2.24483	0.0448921	-4.34292
828	RIT1	-1.171	4.63738	-2.24445	0.0449221	-4.343
829	HMGXB3	-1.05917	5.08866	-2.24398	0.04496	-4.34311
830	DDTL	-1.3813	4.73656	-2.24364	0.0449871	-4.34318
831	LRRC37B	-1.20038	5.59919	-2.24358	0.0449927	-4.3432
832	TGM4	-1.30302	8.67674	-2.2431	0.0450312	-4.34331
833	LOC285692	-1.0212	6.09871	-2.24047	0.0452431	-4.34389
834	HAUS1	-1.33336	4.84671	-2.24029	0.0452579	-4.34394
835	MORC1	-1.05703	6.72481	-2.23644	0.0455708	-4.3448
836	MAPKAPK5-AS1	-1.24429	4.53407	-2.23498	0.0456895	-4.34513
837	DNAJA4	-1.10316	5.67384	-2.23203	0.0459312	-4.34579
838	POLR3C	-1.162	5.94515	-2.23046	0.0460598	-4.34614
839	TOP1	-1.1241	6.51811	-2.22844	0.0462263	-4.3466
840	CHIC2	-1.29199	6.02444	-2.22232	0.0467343	-4.34797
841	RAB10	-1.18087	6.02933	-2.22203	0.0467585	-4.34804
842	CCDC18	-1.10194	4.82726	-2.21988	0.0469388	-4.34852
843	MRPL45	-1.55531	5.59765	-2.2172	0.047164	-4.34912
844	APOO	-1.42374	5.20346	-2.21637	0.0472336	-4.34931
845	C19orf6	-1.06597	6.21702	-2.21602	0.0472635	-4.34939
846	C18orf54	-1.16234	5.80947	-2.21189	0.0476123	-4.35032
847	OSBPL8	-1.13259	5.79549	-2.20976	0.0477941	-4.3508
848	ATXN3L	-1.2858	5.12934	-2.2088	0.047876	-4.35101
849	SLC35A5	-1.23286	5.64804	-2.20863	0.0478901	-4.35105
850	TTTY2	-1.26161	5.81839	-2.2036	0.0483215	-4.35218
851	TTTY2B	-1.26161	5.81839	-2.2036	0.0483215	-4.35218
852	GALNTL5	-1.19898	7.24061	-2.20195	0.0484644	-4.35255
853	IFT80	-1.09578	6.26163	-2.20106	0.0485408	-4.35275
854	FUNDC2P2	-1.42133	7.47018	-2.19945	0.0486808	-4.35311
855	BTG4	-1.11575	6.50286	-2.19791	0.0488143	-4.35346
856	CCDC62	-1.6107	6.88611	-2.19756	0.0488449	-4.35354
857	HIF1A	-1.21353	4.6303	-2.19652	0.0489349	-4.35377
858	PLA2G7	-1.3194	6.50063	-2.19638	0.0489472	-4.3538
859	PRDX1	-1.16391	6.29179	-2.19621	0.0489625	-4.35384
860	C12orf63	-1.08233	5.41521	-2.19618	0.0489648	-4.35385
861	C12orf55	-1.08233	5.41521	-2.19618	0.0489648	-4.35385
862	LOC100653304	-1.08233	5.41521	-2.19618	0.0489648	-4.35385
863	ZNHIT3	-1.17292	5.89805	-2.19576	0.0490016	-4.35394
864	ERLIN1	-1.36745	5.66247	-2.19361	0.0491898	-4.35443
865	DDX60L	-1.33233	5.08625	-2.1927	0.0492696	-4.35463
866	SRSF5	-1.03986	4.81524	-2.19182	0.0493464	-4.35483
867	CCNT1	-1.04527	5.72784	-2.18943	0.0495568	-4.35537
868	N4BP2L2	-1.03063	5.98083	-2.18825	0.049661	-4.35563
869	CIB1	-1.11049	7.5011	-2.18471	0.049975	-4.35643
